# Supplementary material
Source: ML conference proceedings conference paper supplement (https://openaccess.thecvf.com/content/CVPR_2020/html/Hao_Towards_Learning_a_CVPR_2020_paper.html)
Supplement: Supplementary file 1 [file Hao_Towards_Learning_a_CVPR_2020_supplemental.pdf]

# Supplementary Material: Towards Learning a Generic Agent for Vision-and-Language Navigation via Pre-training

**Summary of Contributions.** Weituo implemented the algorithm, made the model work, and ran all experiments. Chunyuan initiated the idea of pre-training the first generic agent for VLN, led and completed the manuscript writing. Xiujun provided the codebase and helped implementation. Lawrence and Jianfeng edited the final manuscript.

## A. Experiments

**Three types of inputs on CVDN** We illustrate the naming of three types of text inputs on CVDN in Table 6.

|               | $V$ | $t_0$ | $A_i$ | $Q_i$ | $Q_{1:i-1} \& A_{1:i-1}$ |
|---------------|-----|-------|-------|-------|--------------------------|
| Oracle Answer | ✓   | ✓     | ✓     |       |                          |
| Navigation QA | ✓   | ✓     | ✓     | ✓     |                          |
| All           | ✓   | ✓     | ✓     | ✓     | ✓                        |

Table 6: Three types of inputs on CVDN.  $t_0$  is the target object,  $V$  is the ResNet feature.  $Q_i$  and  $A_i$  are the question and answers in the  $i$ -th turn.  $Q_{1:i-1} \& A_{1:i-1}$  are the question & answer pairs before the  $i$ -th turn.

**Ablation Study Results on HANNA** Table 7 shows the results with different pre-training objectives. We see that the  $\mathcal{L}_{PA} + \mathcal{L}_{MLM}$  yields the best performance among all variants.

| Agent                                                | SEEN-ENV     |              |             |            | UNSEEN-ALL   |              |             |            |
|------------------------------------------------------|--------------|--------------|-------------|------------|--------------|--------------|-------------|------------|
|                                                      | SR ↑         | SPL ↑        | NE ↓        | #R ↓       | SR ↑         | SPL ↑        | NE ↓        | #R ↓       |
| PREVALENT ( $\mathcal{L}_{PA} + \mathcal{L}_{MLM}$ ) | <b>83.82</b> | <b>59.38</b> | <b>1.47</b> | <b>3.4</b> | <b>52.91</b> | <b>28.72</b> | <b>5.29</b> | <b>6.6</b> |
| PREVALENT ( $\mathcal{L}_{MLM}$ )                    | 78.75        | 54.68        | 1.82        | 4.3        | 44.29        | 24.27        | 6.33        | 8.1        |
| BERT (feature-based)                                 | 57.54        | 34.33        | 4.71        | 3.9        | 24.12        | 11.50        | 9.55        | 11.3       |
| BERT (fine-tuning)                                   | 80.75        | 57.46        | 1.97        | 4.0        | 26.36        | 12.66        | 9.1         | 8.3        |

Table 7: Ablation study of pre-training objectives on test splits of HANNA.

## B. Comparison with Related Work

**Comparison with PRESS.** The differences are summarized in Table 8 (a). Empirically, we show that (1) incorporating visual and action information into pre-training can improve navigation performance; (2) Pre-training can generalize across different new navigation tasks.

**Comparison with vision-language pre-training (VLP).** The differences are in Table 8 (b). Though the proposed methodology generally follows self supervised learning such as VLP or BERT, our research scope and problem setups are different, which renders existing pre-models are not readily applicable.

|                   | Prevalent (Proposed)            | Press                |
|-------------------|---------------------------------|----------------------|
| <b>Dataset</b>    | Augmented R2R dataset           | Generic language     |
| <b>Modality</b>   | Vision-language-action triplets | Language             |
| <b>Learning</b>   | Train from scratch              | Off-the-shelf (BERT) |
| <b>Downstream</b> | Three navigation tasks          | R2R                  |

(a) PRESS

|                        | Prevalent (Proposed)                                         | VLP                                       |
|------------------------|--------------------------------------------------------------|-------------------------------------------|
| <b>Visual Input</b>    | Panoramic views<br>(Size: $36 \times 640 \times 480$ )       | Single image<br>(Size: $640 \times 480$ ) |
| <b>Visual Features</b> | ResNet (View-level)                                          | Fast RCNN (Object-level)                  |
| <b>Objectives</b>      | Attentive MLM &<br>Action Prediction                         | Masking on VL &<br>Same-Pair Prediction   |
| <b>Downstream</b>      | RL: Navigation in sequential<br>decision-making environments | Single-step prediction                    |

(b) VLP

Table 8: Comparison with related works.
